# Supplementary material for: The selectivity of a polydimethylsiloxane-based triblock copolymer as the stationary phase for capillary gas chromatography
Source: Royal Society of Chemistry journal article supplement (doi:10.1039/d1nj03893a), 2021-01-01
Supplement: d1nj03893a1.pdf [file d1nj03893a1.pdf]

## Supplementary Information

### **The selectivity of polydimethylsiloxane-based triblock copolymer as stationary phase for capillary gas chromatography**

Tao Sun<sup>a\*</sup>, Qiuchen Huang<sup>b</sup>, Ruonan Chen<sup>b</sup>, Wei Zhang<sup>b</sup>, Qionglu Li<sup>a</sup>, Aoping Wu<sup>a</sup>,

Guixia Wang<sup>a</sup>, Shaoqiang Hu<sup>a</sup> and Zhiqiang Cai<sup>b\*</sup>

*<sup>a</sup> College of Chemistry and Chemical Engineering, Henan Key Laboratory of Function-Oriented Porous Materials, Luoyang Normal University, Luoyang 471934, P. R. China*

*<sup>b</sup> Liaoning Province Professional and Technical Innovation Center for Fine Chemical Engineering of Aromatics Downstream, School of Petrochemical Engineering, Shenyang University of Technology, Liaoyang, 111003, Liaoning, P. R. China*

\* Corresponding author.

E-mail addresses: *suntao2226@163.com, suntao@lynu.edu.cn* (T. Sun);  
*kahongzqc@163.com, czq0601@sut.edu.cn* (Z. Cai)

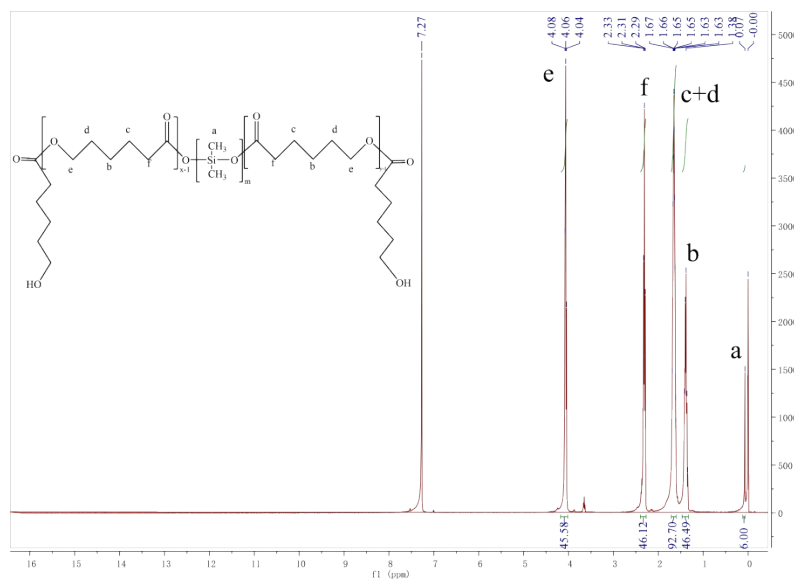

**Fig. S1.** <sup>1</sup>H-NMR spectrum (CDCl<sub>3</sub>) of the PCL-PDMS-PCL

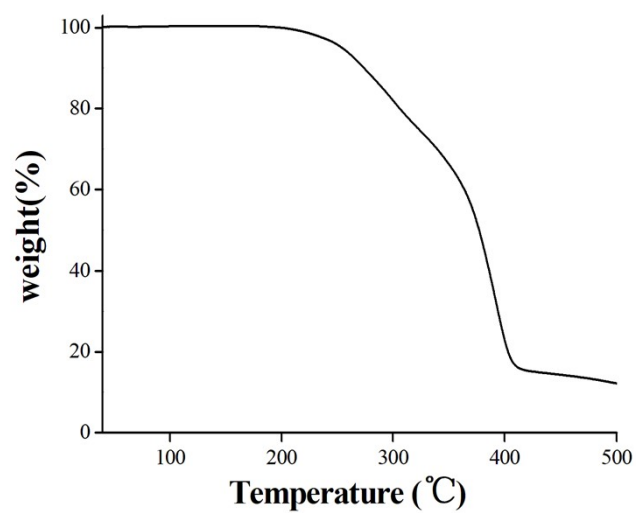

**Fig. S2.** TGA curve of PCL-PDMS-PCL from 40 °C to 500 °C at 10 °C/min

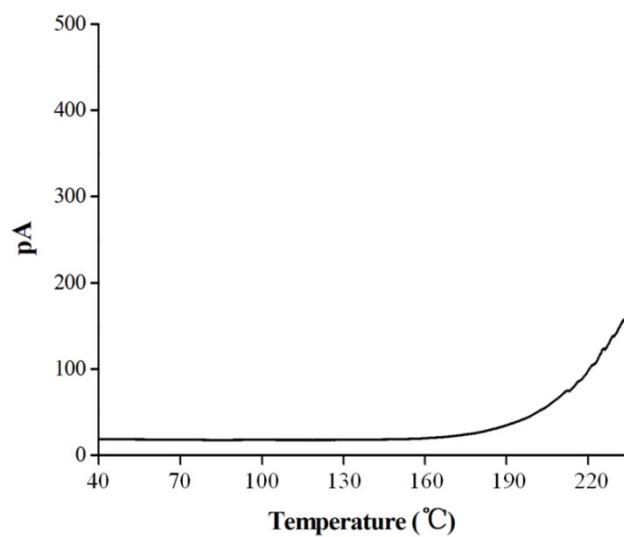

**Fig. S3.** Determination of the bleed temperature of the PCL-PDMS-PCL column for a blank analysis on GC-FID. Oven temperature: 40°C to 230°C at 3°C /min.
